# Supplementary material
Source: publisher figshare collection journal article supplement (https://frontiersin.figshare.com/ndownloader/files/12810131)
Supplement: Supplementary file [file 12810131]

Table S1: Self-reported levels language proficiency, frequency of L1 use and language attitudes

|                                                                                  |                    | Germans<br>in Canada<br>(n = 53) | Germans in<br>the Netherlands<br>(n = 53) | Moroccans in<br>the Netherlands<br>(n = 35) | Turks in<br>the Netherlands<br>(n = 52) |
|----------------------------------------------------------------------------------|--------------------|----------------------------------|-------------------------------------------|---------------------------------------------|-----------------------------------------|
| Self-rated language proficiency                                                  |                    |                                  |                                           |                                             |                                         |
| L1 proficiency at time of testing                                                | none/very bad      |                                  |                                           |                                             | 1                                       |
|                                                                                  | bad                | 1                                |                                           |                                             |                                         |
|                                                                                  | some               | 7                                | 12                                        | 12                                          | 11                                      |
|                                                                                  | good               | 17                               | 29                                        | 6                                           | 32                                      |
|                                                                                  | very good          | 28                               | 12                                        | 17                                          | 8                                       |
| L2 proficiency at time of testing                                                | none/very bad      |                                  |                                           |                                             |                                         |
|                                                                                  | bad                |                                  | 3                                         | 1                                           | 8                                       |
|                                                                                  | some               | 1                                | 11                                        | 18                                          | 20                                      |
|                                                                                  | good               | 14                               | 20                                        | 15                                          | 18                                      |
|                                                                                  | very good          | 38                               | 19                                        | 1                                           | 6                                       |
| L1 proficiency at time of emigration                                             | none/very bad      |                                  |                                           |                                             |                                         |
|                                                                                  | bad                |                                  |                                           |                                             |                                         |
|                                                                                  | some               |                                  |                                           | 1                                           | 6                                       |
|                                                                                  | good               | 7                                | 18                                        | 6                                           | 35                                      |
|                                                                                  | very good          | 46                               | 35                                        | 28                                          | 11                                      |
| L2 proficiency at time of emigration                                             | none/very bad      | 9                                | 49                                        | 35                                          | 52                                      |
|                                                                                  | bad                | 10                               | 1                                         |                                             |                                         |
|                                                                                  | some               | 21                               | 2                                         |                                             |                                         |
|                                                                                  | good               | 6                                | 1                                         |                                             |                                         |
|                                                                                  | very good          | 7                                |                                           |                                             |                                         |
| Frequency of use of L1                                                           |                    |                                  |                                           |                                             |                                         |
| How frequently do you use your L1 overall?                                       | rarely             |                                  |                                           |                                             | 1                                       |
|                                                                                  | a few times a year | 4                                | 9                                         |                                             |                                         |
|                                                                                  | monthly            | 6                                | 9                                         |                                             |                                         |
|                                                                                  | weekly             | 15                               | 13                                        | 7                                           | 1                                       |
|                                                                                  | daily              | 28                               | 22                                        | 28                                          | 50                                      |
| How frequently do you use your L1 at work?                                       | never              | 34                               | 29                                        | 27                                          | 35                                      |
|                                                                                  | seldom             | 4                                | 7                                         | 3                                           | 5                                       |
|                                                                                  | sometimes          | 5                                | 7                                         | 1                                           | 8                                       |
|                                                                                  | often              | 6                                | 8                                         | 1                                           | 3                                       |
|                                                                                  | very often         | 4                                | 2                                         | 3                                           | 1                                       |
| How frequently do you use your L2 at work?                                       | never              |                                  | 1                                         | 4                                           | 7                                       |
|                                                                                  | seldom             | 1                                | 2                                         | 1                                           | 7                                       |
|                                                                                  | sometimes          | 2                                | 5                                         | 1                                           | 9                                       |
|                                                                                  | often              | 11                               | 9                                         | 5                                           | 6                                       |
|                                                                                  | very often         | 39                               | 36                                        | 24                                          | 23                                      |
| How frequently do you have contact with friends and family in your home country? | never              | 2                                | 2                                         |                                             |                                         |
|                                                                                  | seldom             | 3                                | 10                                        |                                             | 3                                       |
|                                                                                  | sometimes          | 6                                | 16                                        | 5                                           | 11                                      |
|                                                                                  | often              | 19                               | 17                                        | 7                                           | 28                                      |
|                                                                                  | very often         | 23                               | 8                                         | 23                                          | 10                                      |

|                                                                                                 |                                       |     |     |     |     |
|-------------------------------------------------------------------------------------------------|---------------------------------------|-----|-----|-----|-----|
| How frequently do you visit your home country?                                                  | never                                 | 4   |     |     |     |
|                                                                                                 | seldom                                | 31  |     |     | 1   |
|                                                                                                 | sometimes                             | 17  |     |     |     |
|                                                                                                 | often                                 |     | 24  |     | 10  |
|                                                                                                 | very often                            | 1   | 29  | 35  | 41  |
| How frequently do you use your L1 with your partner?                                            | average (0 = never, 1 = all the time) | .45 | .43 | .68 | .89 |
| How frequently do you use your L1 with your children?                                           | average (0 = never, 1 = all the time) | .36 | .43 | .49 | .75 |
| How frequently do you use your L1 with your grandchildren?                                      | average (0 = never, 1 = all the time) | .19 | .16 | .66 | .10 |
| How frequently do you use your L1 with your friends and acquaintances?                          | average (0 = never, 1 = all the time) | .39 | .34 | .58 | .66 |
| What is the native language of most of your friends and acquaintances?                          | average (0 = all L2, 1 = all L1)      | .28 | .46 | .62 | .49 |
| How frequently do you read books/newspapers, listen to the radio/music/watch TV in your L1?     | average (0 = never, 1 = very often)   | .45 | .43 | .68 | .89 |
| Attitudinal factors                                                                             |                                       |     |     |     |     |
| How important is it to you to maintain a good level of proficiency in your L1?                  | not important at all                  | 3   | 1   | 1   |     |
|                                                                                                 | not important                         | 6   | 2   |     | 1   |
|                                                                                                 | neutral                               | 2   | 5   | 1   | 2   |
|                                                                                                 | important                             | 6   | 15  | 7   | 16  |
|                                                                                                 | very important                        | 36  | 30  | 26  | 33  |
| How important is it to you that your children should have a good level of knowledge of your L1? | not important at all                  | 2   | 2   | 1   | 4   |
|                                                                                                 | not important                         | 6   | 2   | 2   | 2   |
|                                                                                                 | neutral                               | 5   | 3   |     | 4   |
|                                                                                                 | important                             | 18  | 27  | 8   | 16  |
|                                                                                                 | very important                        | 22  | 19  | 24  | 26  |
| Which culture do you prefer?                                                                    | only L2                               | 2   | 1   |     |     |
|                                                                                                 | more L2                               | 15  | 14  | 1   | 6   |
|                                                                                                 | equal                                 | 16  | 17  | 21  | 15  |
|                                                                                                 | more L1                               | 13  | 15  | 11  | 23  |
|                                                                                                 | only L1                               | 7   | 6   | 2   | 8   |
| Which language do you prefer?                                                                   | L2                                    | 24  | 13  | 3   | 4   |
|                                                                                                 | equal                                 | 1   | 27  | 6   | 11  |
|                                                                                                 | L1                                    | 28  | 13  | 26  | 37  |
| Do you consider yourself a balanced bilingual?                                                  | No, my L2 is better                   | 15  | 10  | 1   | 2   |
|                                                                                                 | yes                                   | 30  | 28  | 4   | 12  |
|                                                                                                 | No, my L1 is better                   | 8   | 15  | 30  | 38  |
